# Supplementary material for: ABCA1 Regulates IOP by Modulating Cav1/eNOS/NO Signaling Pathway
Source: PubMed Central journal article supplement — Invest Ophthalmol Vis Sci. 2020 May 19;61(5):33. doi: 10.1167/iovs.61.5.33 (PMC7405707; doi:10.1167/iovs.61.5.33), 2020-05-19
Supplement: iovs-61-5-33_s001.pdf [file iovs-61-5-33_s001.pdf]

# **ABCA1 regulates intraocular pressure by modulating Cav1/eNOS/NO signaling pathway**

*Chunchun Hu<sup>1\*</sup>, Liangliang Niu<sup>1\*</sup>, Liping Li<sup>1</sup>, Maomao Song<sup>1</sup>, Youjia Zhang<sup>1</sup>, Yuan Lei<sup>1,2#</sup>, Yuhong Chen<sup>1,2#</sup>, Xinghuai Sun<sup>1-3#</sup>*

<sup>1</sup>Department of Ophthalmology & Visual Science, Eye Institute, Eye & ENT Hospital, Shanghai Medical College, Fudan University, Shanghai 200031, China

<sup>2</sup> Key Laboratory of Myopia, Chinese Academy of Medical Sciences (Fudan University), and Shanghai Key Laboratory of Visual Impairment and Restoration (Fudan University), Shanghai 200031, China

<sup>3</sup>State Key Laboratory of Medical Neurobiology, Institutes of Brain Science and Collaborative Innovation Center for Brain Science, Fudan University, Shanghai 200032, China

\*Co-first authors

# Correspondence:

Xinghuai Sun, Department of Ophthalmology & Visual Science, Eye Institute, Eye & ENT Hospital, Shanghai Medical College, Fudan University, Shanghai, China. E-mail: xhsun@shmu.edu.cn

Yuhong Chen, Department of Ophthalmology & Visual Science, Eye Institute, Eye & ENT Hospital, Shanghai Medical College, Fudan University, Shanghai, China. E-mail: yuhongchen@fudan.edu.cn

Yuan Lei, Department of Ophthalmology & Visual Science, Eye Institute, Eye & ENT Hospital, Shanghai Medical College, Fudan University, Shanghai, China. E-mail: lilian0167@hotmail.com

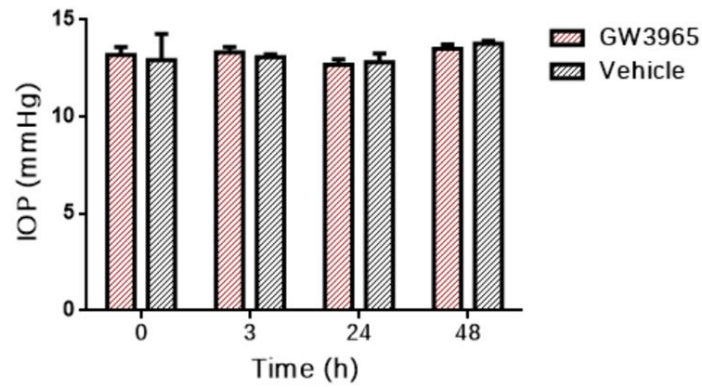

**Fig.S1.** Intraocular pressure of WT mice treated with topical application of GW3965 and DMSO. GW3965 did not significant affect IOP (n=4, p>0.05).

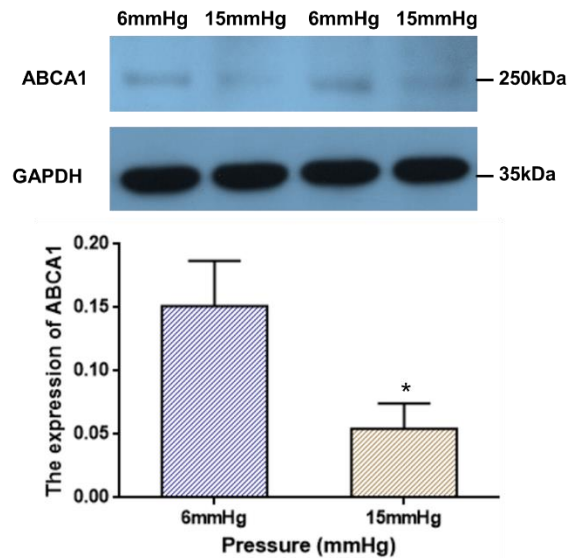

**Fig.S2.** To characterize ABCA1 expression under elevated IOP, we perfused enucleated mouse eyes at constant pressures. The expression of ABCA1 was lower by 36.01% at 15 mmHg compare to 6 mmHg (n=3, \*p<0.05, data were analyzed by one-way ANOVA).

**Table S1.** Intraocular pressure measured 6 and 12 hours after anterior chamber injection of 2  $\mu$ L of 100  $\mu$ M GW3965 and vehicle control (2  $\mu$ L 0.2% DMSO in PBS) in mouse model (n=5, mice in each group).

| <b>IOP (mmHg)</b> | <b>0 hour</b> |                | <b>6 hours</b> |                | <b>12 hours</b> |                |
|-------------------|---------------|----------------|----------------|----------------|-----------------|----------------|
| <b>Mice NO.</b>   | <b>GW3965</b> | <b>Vehicle</b> | <b>GW3965</b>  | <b>Vehicle</b> | <b>GW3965</b>   | <b>Vehicle</b> |
| <b>1</b>          | 13.0          | 12.7           | 8.7            | 12.0           | 10.3            | 12.0           |
| <b>2</b>          | 12.3          | 13.0           | 8.0            | 12.7           | 9.0             | 13.0           |
| <b>3</b>          | 14.0          | 14.0           | 9.0            | 11.0           | 11.0            | 12.7           |
| <b>4</b>          | 12.7          | 13.3           | 9.3            | 12.7           | 12.0            | 13.0           |
| <b>5</b>          | 13.3          | 14.0           | 8.0            | 9.3            | 9.3             | 12.3           |
| <b>Mean</b>       | 13.1          | 13.4           | 8.6            | 11.5           | 10.3            | 12.6           |
| <b>SD</b>         | 0.64          | 0.60           | 0.60           | 1.41           | 1.22            | 0.43           |
